# Supplementary material for: Contrasting responses of non-small cell lung cancer to antiangiogenic therapies depend on histological subtype
Source: PubMed Central journal article supplement (PMC3992079; doi:10.1002/emmm.201303214), 2014-02-05

Figure 4E

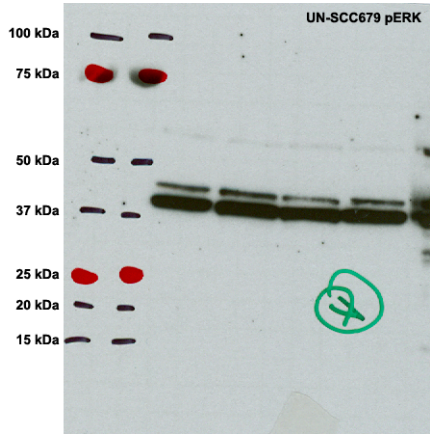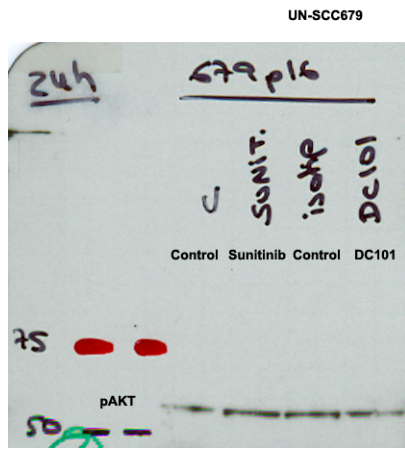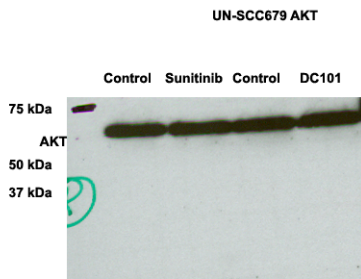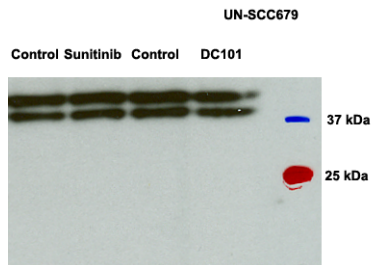

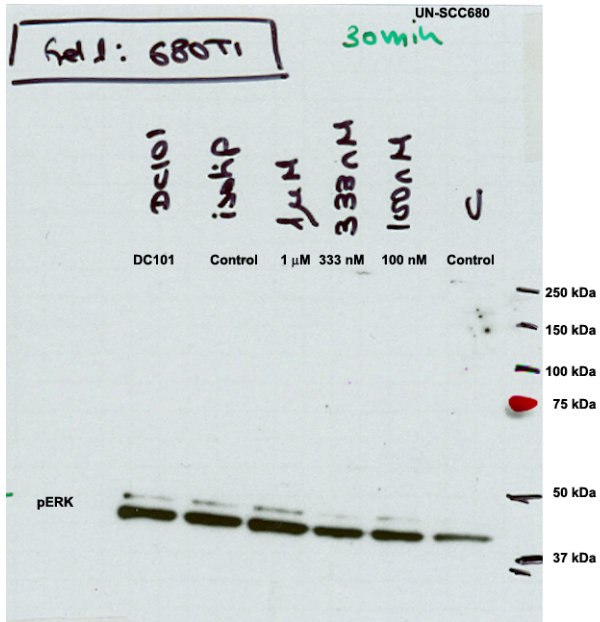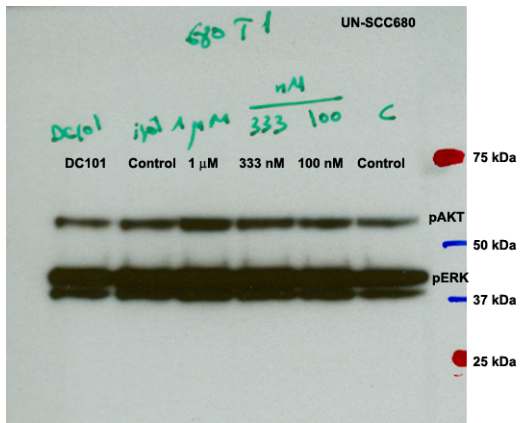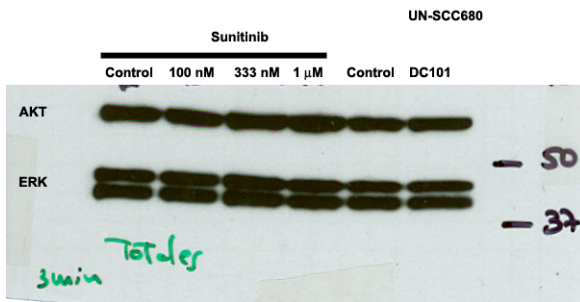

Supplement: emmm0006-0539-sd3.pdf [file emmm0006-0539-sd3.pdf]
